# Supplementary material
Source: PubMed Central journal article supplement (PMC5590635)
Supplement: NIHMS874872-supplement-Supp_TableS1.pdf [file NIHMS874872-supplement-Supp_TableS1.pdf]

**Supplementary Table 1. Plasma levels of s-MICA according to case-control status**

| Participant characteristics       | Pancreatic cancer cases |        |                  | Controls |     |        |                 |         |
|-----------------------------------|-------------------------|--------|------------------|----------|-----|--------|-----------------|---------|
|                                   | n                       | Median | (Range)          | p-value  | n   | Median | (Range)         | p-value |
| Overall                           | 152                     | 58.48  | (2.66 - 524.29)  |          | 465 | 43.07  | (2.73 - 230.35) |         |
| Sex                               |                         |        |                  |          |     |        |                 |         |
| Women                             | 58                      | 52.53  | (2.66 - 497.38)  |          | 199 | 47.49  | (3.36 - 230.35) |         |
| Men                               | 94                      | 66.18  | (2.66 - 524.29)  | 0.12     | 266 | 41.77  | (2.73 - 217.82) | 0.08    |
| Age (years)                       |                         |        |                  |          |     |        |                 |         |
| <70                               | 88                      | 59.44  | (2.66 - 497.38)  |          | 262 | 40.94  | (2.73 - 199.51) |         |
| >70                               | 64                      | 55.99  | (2.66 - 524.29)  | <0.05    | 203 | 47.73  | (4.0 - 230.35)  | 0.95    |
| Smoking History                   |                         |        |                  |          |     |        |                 |         |
| Never Smokers                     | 56                      | 57.02  | (2.66 - 497.38)  |          | 209 | 40.18  | (2.73 - 230.35) |         |
| Former Smokers                    | 72                      | 61.35  | (2.66 - 337.41)  |          | 207 | 47.49  | (3.36 - 217.82) |         |
| Current Smokers                   | 22                      | 47.59  | (13.08 - 524.29) | 0.15     | 49  | 42.72  | (5.81 - 117.01) | 0.78    |
| Alcohol Consumption<br>(per week) |                         |        |                  |          |     |        |                 |         |
| 0                                 | 64                      | 58.89  | (10.21 - 524.29) |          | 177 | 47.49  | (3.70 - 230.35) |         |
| 0-6                               | 41                      | 59.04  | (2.66 - 337.41)  |          | 181 | 41.97  | (2.73 - 182.64) |         |
| >7                                | 15                      | 55.89  | (2.66 - 225.32)  | 0.1      | 81  | 41.16  | (3.36 - 176.44) | 0.79    |
| Diabetes Status                   |                         |        |                  |          |     |        |                 |         |
| Yes                               | 47                      | 70.73  | (4.54 - 214.47)  |          | 36  | 70.77  | (4.31 - 199.51) |         |
| No                                | 96                      | 54.11  | (2.66 - 524.29)  | 0.57     | 422 | 42.73  | (2.73 - 230.35) | 0.02    |
