# Supplementary material
Source: PubMed Central journal article supplement (PMC5590635)

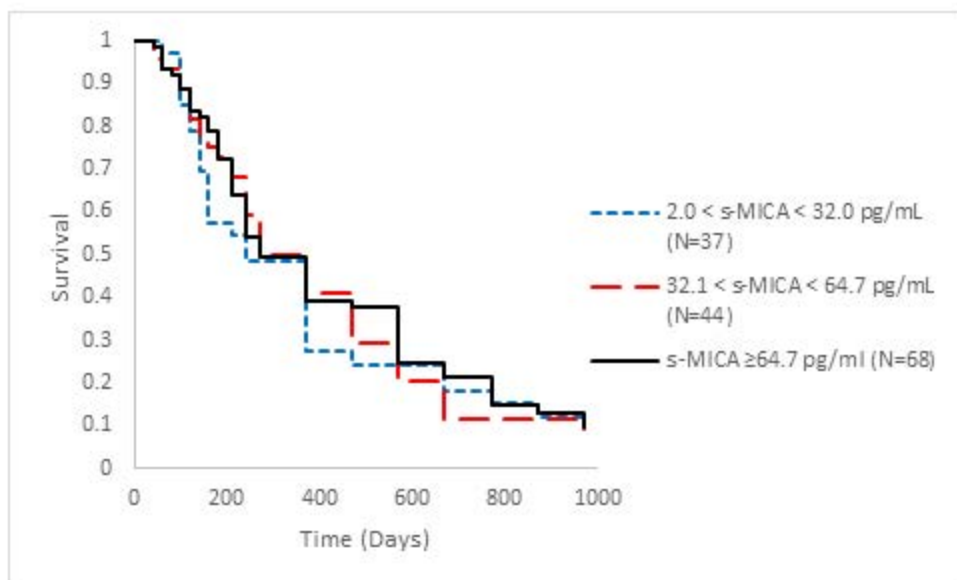

Supplement: NIHMS874872-supplement-Supp_Fig_S1.pdf [file NIHMS874872-supplement-Supp_Fig_S1.pdf]
